# Supplementary material
Source: PubMed Central journal article supplement (PMC6855254)

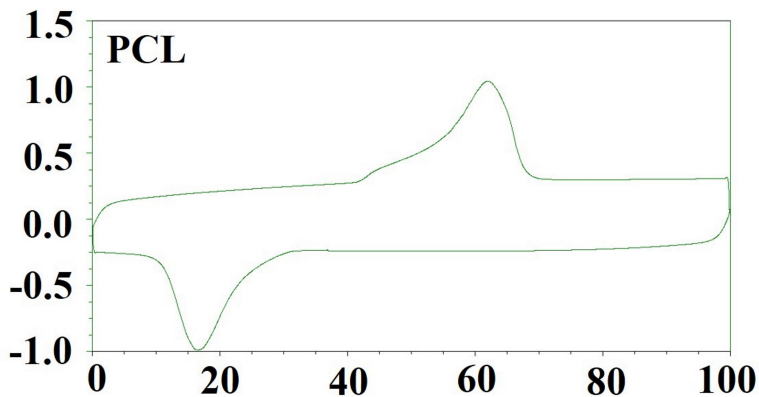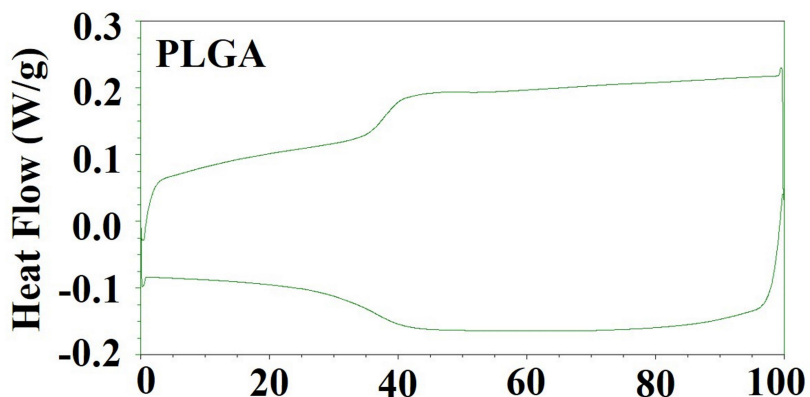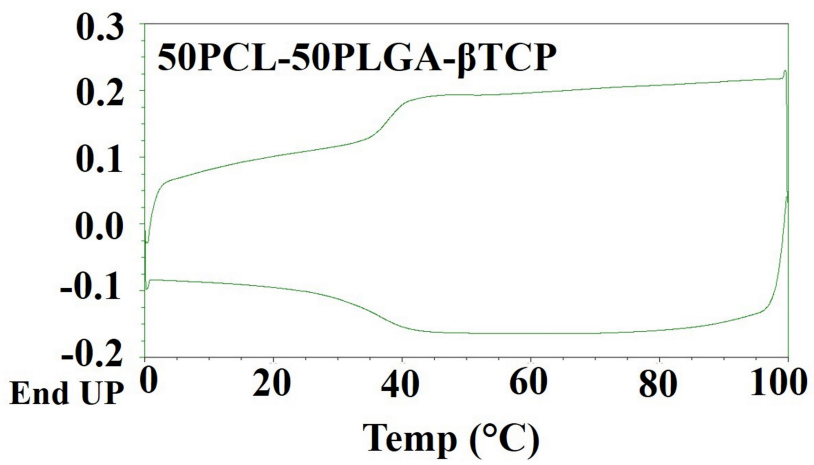

End UP

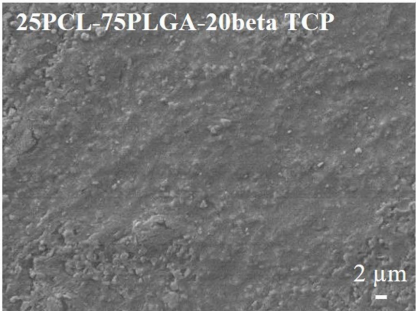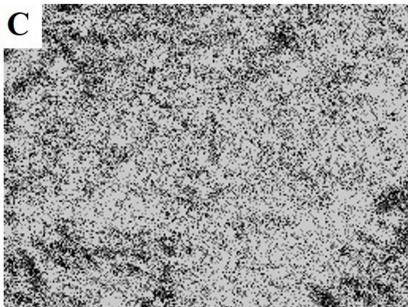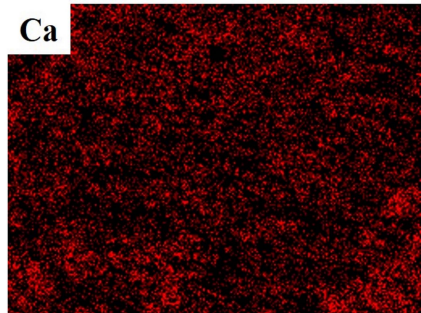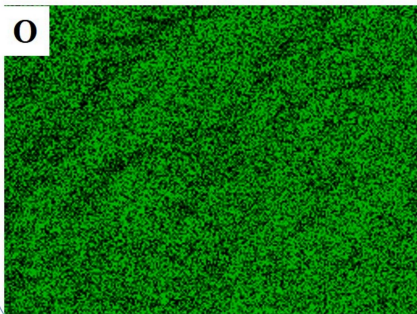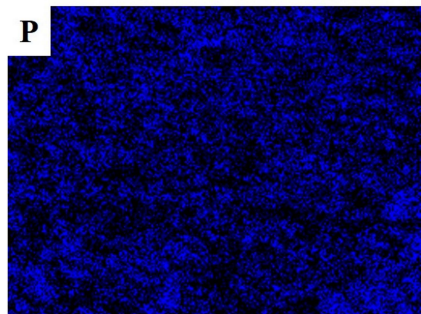

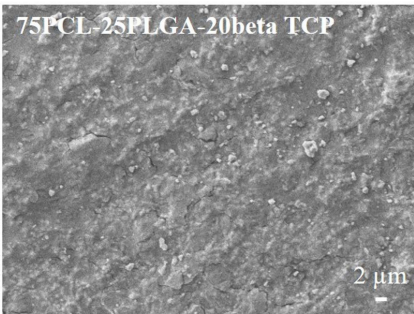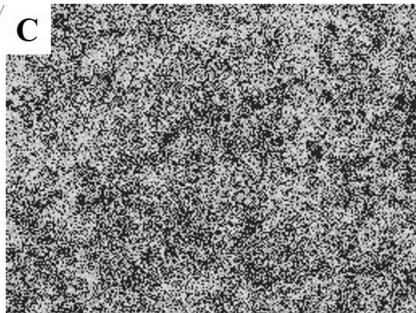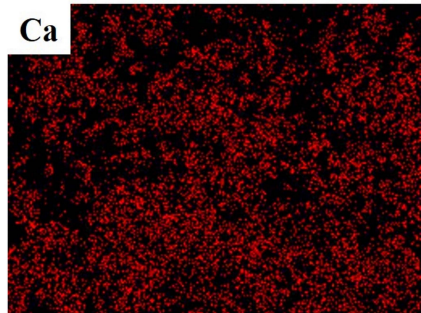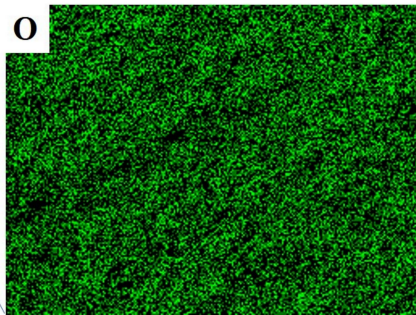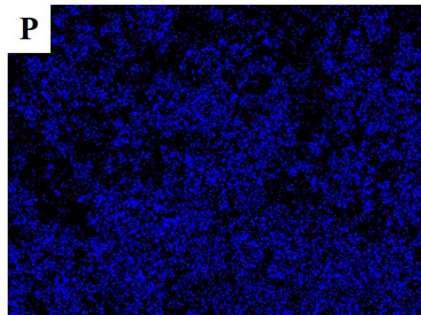

Supplement: NIHMS1006546-supplement-Supp_figS1-2.pdf [file NIHMS1006546-supplement-Supp_figS1-2.pdf]
